# Supplementary material for: Millimeter-wave dielectric tunability driven by topological polar structure switching in PbTiO3/SrTiO3 superlattices
Source: Research Square preprint supplement (doi:10.21203/rs.3.rs-6192287/v1), 2025-08-22
Supplement: Supplementary file 1 [file ecbd52543b1e5f894b837d9d.xlsx]

## Sheet: Fig. 1b-c
Fig. 1b									Fig. 1c
n = 12		n = 15		n = 20		n = 22
Qx (Å-1)	Intensity (arb. units)	Qx (Å-1)	Intensity (arb. units)	Qx (Å-1)	Intensity (arb. units)	Qx (Å-1)	Intensity (arb. units)		n (u.c.)	c (Å)	d (mm)
1.40582	9.491	1.39968	3.83385	1.40582	8.23158	1.40582	5.5869		12	9.1	3.96068
1.40877	12.2334	1.4025	10.1238	1.40877	6.83519	1.40877	5.68304		15	10.4	3.96971
1.41172	11.6478	1.40533	8.37624	1.41172	8.31762	1.41172	4.8134		20	12.6	3.97713
1.41467	11.0451	1.40815	10.8031	1.41467	13.5467	1.41467	4.70896		22	13.6	3.97878
1.41762	10.3598	1.41098	12.6731	1.41762	7.19412	1.41762	6.3307
1.42056	9.31437	1.4138	9.34486	1.42056	12.5843	1.42056	6.76073
1.42351	14.6424	1.41663	11.9616	1.42351	10.8217	1.42351	7.61878
1.42646	15.8007	1.41945	12.3982	1.42646	12.1562	1.42646	4.11539
1.42941	15.6264	1.42228	11.9745	1.42941	12.4818	1.42941	6.72298
1.43236	16.5669	1.42511	11.1203	1.43236	14.141	1.43236	6.5835
1.43531	16.3729	1.42793	15.6524	1.43531	13.305	1.43531	6.7106
1.43826	15.9082	1.43076	13.9066	1.43826	14.4652	1.43826	8.44226
1.4412	20.6049	1.43358	13.459	1.4412	20.2507	1.4412	8.06173
1.44415	22.075	1.43641	15.5647	1.44415	20.4498	1.44415	7.41825
1.4471	22.6985	1.43923	16.4969	1.4471	18.5653	1.4471	10.7983
1.45005	27.9674	1.44206	18.6513	1.45005	22.1264	1.45005	8.78092
1.453	20.2647	1.44488	16.2585	1.453	18.9206	1.453	13.6957
1.45595	25.4723	1.44771	19.0234	1.45595	19.2522	1.45595	13.6762
1.45889	26.3897	1.45054	18.7047	1.45889	21.3953	1.45889	13.4993
1.46184	27.7351	1.45336	23.8833	1.46184	24.2929	1.46184	12.7422
1.46479	24.3784	1.45619	23.5662	1.46479	22.5778	1.46479	13.1023
1.46774	22.8071	1.45901	25.9845	1.46774	27.7086	1.46774	16.0479
1.47069	25.5275	1.46184	30.0767	1.47069	35.7022	1.47069	16.3952
1.47364	22.1091	1.46466	34.8337	1.47364	46.2611	1.47364	16.9717
1.47659	33.3667	1.46749	33.5763	1.47659	55.56	1.47659	15.8885
1.47953	25.1022	1.47031	33.8234	1.47953	74.8658	1.47953	23.2824
1.48248	28.1605	1.47314	39.5409	1.48248	93.0363	1.48248	27.6263
1.48543	36.2826	1.47597	42.0778	1.48543	116.613	1.48543	39.5648
1.48838	39.8875	1.47879	46.403	1.48838	144.017	1.48838	45.6763
1.49133	34.046	1.48162	44.5437	1.49133	163.43	1.49133	60.3366
1.49428	37.5784	1.48444	48.2555	1.49428	166.754	1.49428	68.6204
1.49723	44.7757	1.48727	52.7846	1.49723	140.967	1.49723	69.3363
1.50017	60.9252	1.49009	48.972	1.50017	119.362	1.50017	65.3747
1.50312	74.7018	1.49292	42.162	1.50312	91.9387	1.50312	68.4471
1.50607	90.2118	1.49574	59.9173	1.50607	91.3717	1.50607	61.664
1.50902	124.399	1.49857	59.7626	1.50902	84.2759	1.50902	48.7086
1.51197	170.527	1.5014	62.2525	1.51197	74.6722	1.51197	48.8432
1.51492	233.285	1.50422	61.0984	1.51492	65.2717	1.51492	40.6091
1.51786	267.655	1.50705	78.9479	1.51786	82.347	1.51786	39.6261
1.52081	307.487	1.50987	85.5231	1.52081	97.1709	1.52081	46.0203
1.52376	307.342	1.5127	95.0536	1.52376	128.073	1.52376	51.1806
1.52671	258.311	1.51552	124.555	1.52671	166.958	1.52671	69.3092
1.52966	217.456	1.51835	133.246	1.52966	230.072	1.52966	76.2495
1.53261	191.484	1.52117	185.982	1.53261	341.016	1.53261	106.258
1.53556	158.828	1.524	221.232	1.53556	528.189	1.53556	170.174
1.5385	136.109	1.52683	249.544	1.5385	695.5	1.5385	215.814
1.54145	123.748	1.52965	290.235	1.54145	745.05	1.54145	265.118
1.5444	114.01	1.53248	292.952	1.5444	624.397	1.5444	265.648
1.54735	96.7428	1.5353	267.72	1.54735	485.93	1.54735	239.499
1.5503	90.4217	1.53813	257.068	1.5503	361.76	1.5503	177.861
1.55325	86.873	1.54095	255.43	1.55325	265.329	1.55325	148.992
1.5562	75.6328	1.54378	240.991	1.5562	211.585	1.5562	112.653
1.55914	80.8388	1.5466	227.284	1.55914	171.042	1.55914	100.707
1.56209	89.9795	1.54943	204.546	1.56209	167.014	1.56209	95.7271
1.56504	89.582	1.55226	186.27	1.56504	172.518	1.56504	94.6338
1.56799	112.458	1.55508	174.221	1.56799	173.739	1.56799	97.3378
1.57094	134.015	1.55791	141.937	1.57094	197.578	1.57094	106.094
1.57389	184.624	1.56073	145.272	1.57389	253.462	1.57389	111.335
1.57683	243.336	1.56356	141.901	1.57683	324.243	1.57683	152.273
1.57978	331.215	1.56638	144.181	1.57978	508.187	1.57978	218.375
1.58273	520.719	1.56921	167.451	1.58273	815.513	1.58273	308.126
1.58568	807.523	1.57204	177.065	1.58568	1371.38	1.58568	498.35
1.58863	1355.25	1.57486	222.568	1.58863	2141.7	1.58863	763.7
1.59158	2357.5	1.57769	270.933	1.59158	3097.76	1.59158	970.074
1.59453	3343.95	1.58051	370.157	1.59453	3868.83	1.59453	1164.79
1.59747	3848.5	1.58334	524.992	1.59747	4340.86	1.59747	1309.53
1.60042	3267.93	1.58616	793.543	1.60042	4514.93	1.60042	1405.39
1.60337	2333.89	1.58899	1248.46	1.60337	3514.52	1.60337	1241.69
1.60632	1474.53	1.59181	1851.64	1.60632	2418.69	1.60632	895.179
1.60927	972.713	1.59464	2479.69	1.60927	1514.21	1.60927	638.691
1.61222	657.039	1.59747	3001.72	1.61222	1006.44	1.61222	455.152
1.61517	478.755	1.60029	2942.57	1.61517	694.096	1.61517	331.985
1.61811	366.96	1.60312	2405.99	1.61811	521.728	1.61811	270.766
1.62106	286.127	1.60594	1807.46	1.62106	434.09	1.62106	209.461
1.62401	252.88	1.60877	1254.89	1.62401	387.393	1.62401	203.351
1.62696	211.821	1.61159	888.613	1.62696	347.428	1.62696	168.211
1.62991	171.87	1.61442	664.64	1.62991	356.741	1.62991	182.486
1.63286	172.214	1.61724	529.377	1.63286	433.203	1.63286	175.016
1.6358	171.368	1.62007	402.637	1.6358	472.54	1.6358	172.905
1.63875	167.78	1.6229	352.209	1.63875	497.362	1.63875	182.239
1.6417	185.986	1.62572	326.172	1.6417	481.81	1.6417	163.347
1.64465	200.36	1.62855	271.58	1.64465	390.253	1.64465	126.508
1.6476	216.677	1.63137	273.556	1.6476	326.965	1.6476	105.32
1.65055	244.314	1.6342	266.005	1.65055	273.466	1.65055	94.4825
1.6535	288.828	1.63702	266.665	1.6535	201.363	1.6535	73.3542
1.65644	313.55	1.63985	278.279	1.65644	165.549	1.65644	70.9245
1.65939	340.875	1.64267	278.695	1.65939	141.3	1.65939	58.6546
1.66234	340.989	1.6455	301.013	1.66234	119.963	1.66234	48.2397
1.66529	349.078	1.64833	309.39	1.66529	103.628	1.66529	44.0436
1.66824	305.796	1.65115	294.244	1.66824	87.371	1.66824	46.2569
1.67119	236.883	1.65398	309.721	1.67119	94.0885	1.67119	42.9657
1.67414	188.096	1.6568	289.747	1.67414	89.7165	1.67414	42.6554
1.67708	146.666	1.65963	249.941	1.67708	77.8053	1.67708	39.279
1.68003	109.447	1.66245	241.91	1.68003	91.7539	1.68003	34.2237
1.68298	87.7231	1.66528	183.023	1.68298	80.9958	1.68298	32.674
1.68593	71.0245	1.6681	163.187	1.68593	92.8432	1.68593	28.2491
1.68888	68.9145	1.67093	135.766	1.68888	83.9707	1.68888	21.3671
1.69183	132.544	1.67376	125.33	1.69183	152.096	1.69183	56.1124
1.69477	51.8472	1.67658	100.815	1.69477	67.3426	1.69477	21.2971
1.69772	36.9525	1.67941	74.8598	1.69772	52.5921	1.69772	17.391
1.70067	40.6582	1.68223	71.8816	1.70067	41.3894	1.70067	16.2184
1.70362	34.118	1.68506	60.4307	1.70362	35.2287	1.70362	15.7169
1.70657	29.9554	1.68788	62.4771	1.70657	29.4075	1.70657	13.072
1.70952	36.5029	1.69071	52.1126	1.70952	24.0926	1.70952	9.65429
1.71247	29.2224	1.69353	101.699	1.71247	24.6976	1.71247	12.0378
1.71541	28.7109	1.69636	45.4851	1.71541	19.1969	1.71541	10.8579
1.71836	22.8921	1.69919	44.6814	1.71836	20.1796	1.71836	8.4901
1.72131	32.8682	1.70201	37.9434	1.72131	18.4281	1.72131	8.88531
1.72426	28.3852	1.70484	41.9578	1.72426	22.5344	1.72426	8.81894
1.72721	22.8287	1.70766	37.1344	1.72721	19.0554	1.72721	8.22749
1.73016	24.7811	1.71049	38.1712	1.73016	12.2716	1.73016	8.70758
1.73311	23.8401	1.71331	34.3589	1.73311	15.3955	1.73311	7.12029
1.73605	23.7257	1.71614	32.5511	1.73605	14.6313	1.73605	6.78553
1.739	27.1853	1.71896	32.9609	1.739	9.21154	1.739	8.67285
1.74195	17.7738	1.72179	28.3261	1.74195	17.2729	1.74195	7.55079
1.7449	17.8308	1.72462	25.2175	1.7449	11.2589	1.7449	4.92628
1.74785	13.5894	1.72744	20.0837	1.74785	11.0123	1.74785	6.75408
1.7508	11.9732	1.73027	19.1662	1.7508	10.7113	1.7508	4.38714
1.75375	15.1003	1.73309	16.1958	1.75375	9.69425	1.75375	4.71391
1.75669	15.1275	1.73592	17.8557	1.75669	9.07883	1.75669	5.24376
1.75964	11.5778	1.73874	16.9447	1.75964	8.63365	1.75964	6.59576
1.76259	10.4515	1.74157	16.526	1.76259	9.15164	1.76259

## Sheet: Fig. 2a-c
Fig. 2a									Fig. 2b									Fig. 2c
n = 12		n = 15		n = 20		n = 22			n = 12		n = 15		n = 20		n = 22			Dipole wave		Flux closure
Electric Field (kV cm-1)	Charge density (nC cm-1)	Electric Field (kV cm-1)	Charge density (nC cm-1)	Electric Field (kV cm-1)	Charge density (nC cm-1)	Electric Field (kV cm-1)	Charge density (nC cm-1)		Electric Field (kV cm-1)	Capacitance (pF cm-1)	Electric Field (kV cm-1)	Capacitance (pF cm-1)	Electric Field (kV cm-1)	Capacitance (pF cm-1)	Electric Field (kV cm-1)	Capacitance (pF cm-1)		Electric Field (kV cm-1)	Polarization (μC cm-2)	Electric Field (kV cm-1)	Polarization (μC cm-2)
-0.094528	-0.148415	-0.129776	-0.10217	-0.107346	-0.229076	-0.160217	-0.174511		8.58364	3.83814	8.52196	3.12596	8.44265	2.10877	8.45787	2.11413		-200	-32.8609	220	35.7932
9.75082	-0.114633	9.7364	-0.0729213	9.49448	-0.202315	9.59862	-0.152116		17.4132	6.03124	17.4004	3.89479	17.2202	1.67049	17.3099	2.09202		-180	-32.3815	200	35.2777
17.2618	-0.0817992	17.1737	-0.04808	16.9926	-0.193016	17.076	-0.138072		25.0364	9.2276	24.9514	5.02266	24.7728	2.24425	24.8641	2.3516		-160	-31.6887	180	34.7733
25.0756	-0.0222054	25.0644	-0.013222	24.9458	-0.176504	25.0211	-0.119852		32.911	10.4276	32.9086	6.61457	32.8221	2.26505	32.8566	2.5433		-140	-30.4474	160	-14.3452
32.8109	0.0616815	32.7292	0.03005	32.5529	-0.158095	32.6523	-0.101442		40.7288	8.86873	40.6776	7.20842	40.4789	2.27481	40.5702	2.48085		-120	-29.5073	140	-16.5535
40.7465	0.141203	40.7529	0.0905506	40.6984	-0.140824	40.692	-0.0799962		48.6764	6.82097	48.6452	6.34584	48.6091	2.56708	48.6283	2.53487		-100	-28.478	120	-18.2115
48.6468	0.202126	48.6259	0.144641	48.4048	-0.122035	48.4882	-0.062156		56.5984	5.13165	56.5887	5.28331	56.3837	2.98522	56.4534	2.76397		-80	-27.753	100	-19.6715
56.6064	0.249383	56.5375	0.190717	56.5199	-0.100209	56.5647	-0.0397609		64.6044	4.25944	64.5267	4.28789	64.5147	3.66767	64.5043	3.05974		-60	-26.5123	80	-21.2621
64.5499	0.283735	64.5515	0.22878	64.3625	-0.0743974	64.4186	-0.0181249		72.5111	3.96924	72.5336	3.99059	72.3165	7.5997	72.4062	3.75414		-40	-25.1837	60	-23.2293
72.6025	0.317518	72.5159	0.259231	72.5095	-0.0415639	72.4438	0.0088252		80.6093	3.46069	80.4932	3.86743	80.4787	14.1344	80.4195	6.61534		-20	-23.6323	40	-25.7535
80.4723	0.346935	80.5156	0.292486	80.2705	0.0464984	80.3938	0.0418485		88.4624	3.27795	88.484	3.16776	88.2565	14.1403	88.3879	10.1494		0	-22.2843	20	-27.3479
88.6162	0.372936	88.4704	0.320934	88.448	0.183716	88.3951	0.114348		96.5381	3.28217	96.4228	2.84665	96.4067	8.77551	96.3715	9.68408		20	-20.3362	0	-28.5218
96.4524	0.399317	96.4524	0.34297	96.2425	0.272348	96.3819	0.204118		104.418	3.53836	104.421	3.14262	104.198	5.24834	104.364	6.99046		40	-18.5238	-20	-29.3988
104.46	0.424938	104.375	0.366209	104.366	0.323401	104.348	0.268837		112.394	2.63132	112.299	2.62946	112.312	3.67828	112.336	5.3218		60	-16.422	-40	-30.1848
112.383	0.455684	112.389	0.393054	112.154	0.355855	112.346	0.315715		120.322	2.39042	120.358	2.4887	120.077	2.99407	120.275	4.58367		80	-14.6009	-60	-30.9438
120.328	0.466692	120.222	0.407878	120.257	0.381856	120.325	0.353862		128.294	3.04959	128.156	2.80276	128.188	2.85973	128.27	4.43111		100	-12.3028	-80	-31.69
128.262	0.493642	128.328	0.43272	128.001	0.403302	128.204	0.388404		136.23	2.54875	136.241	2.40507	135.967	2.84708	136.152	4.03575		120	29.5864	-100	-32.3732
136.26	0.515278	136.09	0.452352	136.119	0.427216	136.215	0.424274		144.21	2.54247	144.071	2.63556	144.09	2.67869	144.18	3.68169		140	30.559	-120	-32.9825
144.197	0.534257	144.154	0.470783	143.933	0.448662	144.099	0.452553		152.134	2.6664	152.069	2.60681	151.862	2.65686	152.045	3.47561		160	31.7848	-140	-33.5849
152.16	0.555703	152.053	0.494422	152.061	0.469918	152.144	0.482919		160.118	2.46836	160.011	2.34093	159.985	2.70637	160.09	3.10505		180	32.2861	-160	-34.1643
160.07	0.57658	159.985	0.512052	159.791	0.490795	159.99	0.507781		168.037	2.59665	167.977	2.75719	167.741	2.74539	167.965	3.03432		200	32.8922	-180	-34.7315
168.076	0.59499	167.97	0.531684	167.909	0.512811	168.036	0.532264		176.028	2.66103	175.905	2.27228	175.842	2.70336	175.966	2.84805				-200	-35.2905
176.003	0.617954	175.97	0.556125	175.691	0.534447	175.939	0.556178		183.98	2.36748	183.941	2.28691	183.698	2.61922	183.905	2.65648				-220	-35.8164
183.981	0.637313	183.84	0.567744	183.776	0.555703	183.896	0.577434		190.151	1.15671	190.198	3.62091	190.252	-0.522415	190.259	-0.176539
191.956	0.655722	191.913	0.592586	191.705	0.57639	191.871	0.598501		181.082	2.40364	181.147	1.88438	181.436	1.43077	181.363	1.92826		The other half is calculated by multiplying -1
188.347	0.651547	188.483	0.580165	188.798	0.577909	188.646	0.59907		173.756	2.37936	173.841	2.29816	173.899	1.79729	173.802	1.90045		on both axes through symmetry.
181.374	0.634845	181.425	0.57095	181.449	0.567091	181.342	0.584077		166.146	2.28826	166.123	2.21468	166.385	1.703	166.357	1.91695
173.818	0.616626	173.812	0.552519	174.074	0.556842	174.079	0.570981		158.388	2.21587	158.489	2.26944	158.576	1.72138	158.494	2.04005
166.139	0.598596	166.257	0.536092	166.349	0.539951	166.262	0.555419		150.631	2.25057	150.619	1.92268	150.889	1.72629	150.808	2.03694
158.474	0.581515	158.434	0.518462	158.695	0.530651	158.634	0.541374		142.726	2.26742	142.81	2.1017	142.914	1.73212	142.881	2.03215
150.636	0.564244	150.721	0.500833	150.803	0.51319	150.726	0.523724		134.913	2.37373	134.968	2.70961	135.222	2.01573	135.041	2.05556
142.789	0.546214	142.805	0.488412	143.084	0.503701	142.981	0.509489		126.903	2.27826	126.974	2.35111	127.114	1.88332	127.135	2.01773
134.816	0.528374	134.898	0.467578	135.025	0.485861	135.036	0.491839		119.11	2.39381	119.166	2.16321	119.384	1.868	119.16	2.04361
127.038	0.508825	127.131	0.445942	127.36	0.472006	127.1	0.476846		111.039	2.45916	111.107	2.19432	111.305	1.82612	111.298	1.94918
118.989	0.492314	119.049	0.430316	119.203	0.456064	119.234	0.459954		103.234	2.30443	103.286	2.17656	103.474	1.86566	103.313	2.14832
111.181	0.470867	111.202	0.411484	111.409	0.442209	111.22	0.444392		95.1579	2.56008	95.2388	2.37615	95.4398	2.00129	95.4022	2.19344
103.09	0.453217	103.164	0.395458	103.406	0.427216	103.363	0.429019		87.296	2.51784	87.3681	2.42817	87.5724	2.03683	87.4097	1.99367
95.286	0.434238	95.3709	0.377027	95.5392	0.412602	95.4062	0.410419		79.2747	2.58995	79.3869	2.78004	79.5495	1.95194	79.5198	2.03638
87.2255	0.412602	87.3136	0.357795	87.4738	0.395331	87.4418	0.394098		71.3696	2.6664	71.4153	2.41912	71.6091	2.02928	71.4401	2.29702
79.306	0.394003	79.3652	0.338162	79.6056	0.380148	79.4133	0.378535		63.3435	2.74681	63.438	2.34744	63.6183	2.18071	63.5966	2.14666
71.3239	0.371418	71.4601	0.313722	71.6251	0.364396	71.5979	0.361833		55.4897	2.68787	55.5489	2.60655	55.7067	2.05251	55.5425	2.28724
63.4332	0.35168	63.4653	0.299698	63.6127	0.347694	63.4669	0.341905		47.3987	2.68084	47.4772	2.57395	47.6414	2.09554	47.5861	2.52365
55.3631	0.327576	55.416	0.276059	55.6114	0.329474	55.5954	0.327482		39.5488	2.97835	39.6073	2.84575	39.7876	2.08423	39.653	2.19211
47.5461	0.308977	47.6326	0.25843	47.8008	0.31524	47.6182	0.305656		31.4939	3.11919	31.6101	2.83001	31.7503	2.06055	31.6445	2.46437
39.4343	0.284874	39.5384	0.235191	39.6714	0.296071	39.5769	0.287056		23.5736	3.35425	23.6072	2.914	23.8107	2.65728	23.6945	2.73053
31.5516	0.26134	31.582	0.212754	31.7743	0.281837	31.6878	0.270734		15.5739	3.52007	15.6588	3.42092	15.8399	2.69626	15.7253	2.59014
23.5535	0.235339	23.6817	0.190317	23.8291	0.263428	23.7122	0.24796		7.5943	3.90193	7.62955	3.45452	7.82021	2.29349	7.70084	2.43154
15.5956	0.207819	15.6324	0.166277	15.8471	0.239514	15.7013	0.227083		-0.343666	4.97309	-0.293999	3.35996	-0.0809095	2.44069	-0.189858	2.65712
7.5943	0.179161	7.63596	0.135425	7.85065	0.220345	7.7385	0.206586		-8.38017	5.91514	-8.33851	4.42658	-8.16788	2.71768	-8.28644	3.14857
-0.406952	0.145379	-0.373306	0.110985	-0.20668	0.202695	-0.299606	0.188176		-16.3037	7.87824	-16.2444	5.4951	-16.0594	2.87741	-16.1483	3.29705
-8.28163	0.100209	-8.22395	0.0821366	-8.01247	0.181628	-8.11821	0.164452		-24.3362	10.128	-24.2617	5.73963	-24.0767	3.31934	-24.2249	3.52055
-16.3534	0.0510533	-16.3037	0.0404673	-16.1291	0.159423	-16.2733	0.137882		-32.311	9.40007	-32.2373	6.80977	-32.1051	3.64211	-32.1564	3.79435
-24.3258	-0.0261909	-24.2649	-0.00601	-24.1063	0.13532	-24.1784	0.111501		-40.3091	7.18536	-40.2434	7.01593	-40.0399	4.88936	-40.2113	4.35801
-32.319	-0.110647	-32.2197	-0.0508846	-32.0242	0.106662	-32.1764	0.0818941		-48.2671	5.4169	-48.1317	5.94277	-48.0179	8.35761	-48.1036	4.92977
-40.2962	-0.176314	-40.2097	-0.114591	-40.104	0.0770545	-40.1344	0.0509584		-56.2907	4.41722	-56.2779	4.65143	-56.0408	10.7192	-56.1714	5.8672
-48.2991	-0.22547	-48.2671	-0.163472	-48.0556	0.0282786	-48.2462	0.0118618		-64.2303	4.00122	-64.0749	3.99604	-63.9587	11.2428	-64.1037	7.43239
-56.2379	-0.262668	-56.0536	-0.208747	-55.9319	-0.0552287	-56.0728	-0.0276144		-72.2564	3.58205	-72.2508	3.77418	-72.0089	9.58121	-72.0786	8.57164
-64.2824	-0.296071	-64.2888	-0.237996	-64.026	-0.142911	-64.0965	-0.0811349		-80.1944	3.2022	-80.0862	2.70787	-79.9925	5.65325	-80.1455	7.84188
-72.2227	-0.326627	-72.0962	-0.272854	-71.9856	-0.235718	-72.1346	-0.146992		-88.2365	3.1173	-88.2325	3.09755	-88.0017	3.44746	-88.0987	6.39864
-80.2304	-0.353198	-80.2128	-0.298096	-79.9917	-0.295882	-80.0606	-0.217973		-96.144	3.02121	-96.0503	3.36652	-95.9501	2.90027	-96.0951	5.03235
-88.166	-0.377681	-88.0762	-0.316126	-87.9993	-0.326248	-88.1564	-0.272632		-104.25	2.80857	-104.235	2.71032	-103.99	2.56921	-104.168	3.56849
-96.2425	-0.403113	-96.2521	-0.347778	-96.0118	-0.35111	-96.1368	-0.320839		-112.16	2.64446	-112.018	2.58147	-111.944	2.57208	-112.008	2.93942
-104.122	-0.425887	-104.024	-0.369815	-103.901	-0.372367	-104.034	-0.352534		-120.241	2.76975	-120.23	2.55027	-119.942	2.4634	-120.212	2.84213
-112.258	-0.448093	-112.218	-0.39105	-111.968	-0.392105	-112.199	-0.378155		-128.17	2.67842	-128.012	2.654	-127.993	2.47725	-127.987	2.72643
-120.198	-0.4684	-120.011	-0.411084	-119.987	-0.413741	-119.982	-0.399412		-136.203	2.48545	-136.218	2.46183	-135.95	2.52766	-136.211	2.44781
-128.223	-0.492314	-128.243	-0.431918	-127.916	-0.431391	-128.225	-0.423705		-144.152	2.65345	-144.035	2.47255	-143.982	2.48421	-143.998	2.46564
-136.141	-0.511103	-136.013	-0.453554	-135.999	-0.453407	-135.992	-0.443063		-152.176	2.63555	-152.202	2.27616	-151.989	2.46564	-152.206	2.48835
-144.183	-0.53198	-144.192	-0.471184	-143.984	-0.472006	-144.197	-0.462801		-160.176	2.46342	-160.043	2.08168	-160.008	2.28915	-160.039	2.5151
-152.163	-0.553616	-152.056	-0.49322	-151.966	-0.493073	-152.003	-0.482539		-168.235	2.68232	-168.214	2.42817	-167.985	2.37533	-168.207	2.49309
-160.169	-0.574113	-160.211	-0.507644	-159.995	-0.511482	-160.214	-0.502657		-176.195	2.44144	-176.077	2.6143	-176.092	2.23015	-176.103	2.47082
-168.188	-0.593092	-168.031	-0.526476	-168.05	-0.529892	-168.076	-0.522965		-184.3	2.33712	-184.231	2.82474	-184.042	2.38797	-184.286	2.54684
-176.301	-0.617385	-176.217	-0.546509	-175.975	-0.54944	-176.201	-0.542513		-190.478	2.44833	-190.523	2.44375	-190.607	0.694951	-190.676	0.391873
-184.202	-0.632188	-184.123	-0.568546	-184.135	-0.565762	-184.13	-0.56263		-181.3	2.28349	-181.41	2.16822	-181.674	1.64755	-181.532	1.70699
-192.299	-0.654773	-192.245	-0.591784	-192.109	-0.587967	-192.371	-0.583697		-173.91	2.29216	-173.972	2.43307	-174.225	1.55174	-174.117	1.76033
-188.656	-0.645853	-188.802	-0.58337	-189.104	-0.58588	-188.981	-0.582369		-166.22	2.28488	-166.297	2.36093	-166.543	1.73731	-166.369	1.90683
-181.528	-0.629152	-181.547	-0.568546	-181.808	-0.571456	-181.664	-0.568134		-158.533	2.14021	-158.653	2.06953	-158.864	1.75691	-158.807	1.93131
-173.945	-0.61226	-174.018	-0.551317	-174.244	-0.561397	-174.082	-0.556937		-150.654	2.14211	-150.72	2.01469	-151.014	1.73364	-150.809	2.11661
-166.293	-0.59423	-166.397	-0.531684	-166.642	-0.547922	-166.57	-0.541564		-142.881	2.39247	-143.018	2.58963	-143.195	1.71956	-143.138	2.04071
-158.495	-0.57696	-158.575	-0.514856	-158.841	-0.534637	-158.655	-0.527519		-134.954	2.28221	-135.014	2.2203	-135.304	1.74556	-135.094	1.96545
-150.774	-0.561017	-150.909	-0.499631	-151.087	-0.520592	-151.043	-0.511577		-127.064	2.23957	-127.208	2.02369	-127.379	1.86811	-127.301	2.06981
-142.813	-0.543367	-142.864	-0.483204	-143.186	-0.507497	-142.963	-0.494306		-119.147	2.42359	-119.196	2.38839	-119.493	1.84342	-119.279	2.05431
-134.988	-0.523249	-135.127	-0.458763	-135.303	-0.493452	-135.233	-0.479313		-111.197	2.34143	-111.335	2.2922	-111.499	1.92042	-111.423	1.98225
-127.096	-0.507497	-127.164	-0.448346	-127.421	-0.479977	-127.224	-0.463371		-103.285	2.42215	-103.327	2.43433	-103.653	1.87076	-103.411	2.06013
-119.141	-0.487759	-119.288	-0.42671	-119.455	-0.463845	-119.37	-0.446479		-95.294	2.61093	-95.4262	2.41742	-95.6209	1.76069	-95.5135	2.0736
-111.199	-0.468969	-111.228	-0.410282	-111.566	-0.45075	-111.333	-0.430727		-87.425	2.48404	-87.4442	2.03274	-87.7254	1.95377	-87.5267	2.20514
-103.254	-0.45056	-103.382	-0.390249	-103.544	-0.433289	-103.476	-0.414974		-79.3877	2.4599	-79.5166	2.14085	-79.7441	2.04011	-79.624	2.15486
-95.3709	-0.430632	-95.427	-0.371818	-95.7394	-0.421143	-95.4879	-0.398083		-71.4825	2.52769	-71.5042	2.51764	-71.7621	1.98165	-71.6091	2.00371
-87.3344	-0.408996	-87.4706	-0.351785	-87.6981	-0.40539	-87.5507	-0.381951		-63.4693	2.59509	-63.5975	2.76662	-63.8065	1.98499	-63.6832	2.20243
-79.479	-0.391156	-79.4614	-0.339364	-79.7113	-0.389827	-79.5655	-0.362972		-55.5481	2.78541	-55.6074	3.00264	-55.8477	2.08489	-55.738	2.30201
-71.4409	-0.369899	-71.5627	-0.317728	-71.7902	-0.372936	-71.6972	-0.347789		-47.5549	2.8554	-47.663	2.61439	-47.8825	2.01971	-47.6951	2.16589
-63.4861	-0.350731	-63.547	-0.299298	-63.8129	-0.358322	-63.6527	-0.331088		-39.6121	2.78821	-39.6946	2.4372	-39.8965	2.23393	-39.8084	2.11933
-55.4977	-0.328525	-55.6322	-0.273655	-55.8229	-0.341241	-55.6691	-0.312488		-31.6509	2.92031	-31.7503	2.34542	-31.9994	2.23414	-31.7847	2.29573
-47.6102	-0.30651	-47.6678	-0.251618	-47.8825	-0.325109	-47.8233	-0.294648		-23.6561	3.20768	-23.7322	3.03412	-23.9309	1.95031	-23.7923	2.44316
-39.6121	-0.283166	-39.6938	-0.231986	-39.9422	-0.309167	-39.7211	-0.277946		-15.6917	3.44077	-15.8183	3.36044	-16.0642	2.06591	-15.8807	2.26291
-31.6141	-0.261909	-31.7214	-0.212754	-31.9105	-0.289429	-31.7935	-0.260676		-7.75612	3.70404	-7.79938	3.17766	-8.00205	2.26816	-7.83783	2.36247
-23.6897	-0.236667	-23.8067	-0.194724	-24.0566	-0.273676	-23.8483	-0.241507		0.269165	3.86119	0.161018	3.15887	-0.099335	2.19013	0.068092	2.44929
-15.6981	-0.210856	-15.743	-0.164273	-15.9512	-0.258303	-15.791	-0.221579
-7.69363	-0.181628	-7.82982	-0.141035	-8.07175	-0.240653	-7.91313	-0.205447
0.185852	-0.152021	0.144196	-0.113789	-0.052872	-0.222243	0.115356	-0.184001

## Sheet: Fig. 3c,g
Fig. 3c									Fig. 3g
α = 0° (x-out)				α = 90° (y-out)					Electric Field (kV cm-1)	Relative intensity change
Before		After		Before		After				Split SL(0) peak		Satellite along y		Satellite along x
φ (°）	Intensity (arb. Units)	φ (°）	Intensity (arb. Units)	φ (°）	Intensity (arb. Units)	φ (°）	Intensity (arb. Units)			On	Off	On	Off	On	Off
5	702	5	414	5	3239	5	5928		0	0	0	0	0	0	0
15	1959	15	1523	15	4187	15	4918		10	0.00266575	0.000983959	0.0084682	0.00247447	-0.00163985	0.000646175
25	3537	25	3237	25	5014	25	3665		20	0.0115081	-0.00142018	0.0344266	0.0119563	-0.00398556	-0.00420677
35	4886	35	4971	35	5467	35	2665		30	0.0407427	0.00177372	0.0753004	0.0261613	-0.0183973	-0.00552808
45	5947	45	5730	45	5107	45	1788		40	0.14089	0.0145565	0.148992	0.0766439	-0.0495087	-0.018119
55	6628	55	5543	55	4223	55	1147		50	0.140766	0.0381721	0.156889	0.125598	-0.0558816	-0.0333548
65	6733	65	4099	65	2663	65	742		60	0.211535	0.0619356	0.179411	0.145982	-0.0688456	-0.0430059
75	6880	75	2529	75	1269	75	459		70	0.27931	0.076464	0.199402	0.157691	-0.0756533	-0.0469279
85	7235	85	1272	85	615	85	342		80	0.417521	0.0986793	0.231397	0.172644	-0.102975	-0.0573184
95	7666	95	1164	95	902	95	353		90	0.452182	0.104846	0.232457	0.188262	-0.101577	-0.0645913
105	8186	105	2175	105	1767	105	703		100	0.545907	0.110522	0.236834	0.176948	-0.114037	-0.0704822
115	8235	115	4265	115	3169	115	1256
115	8235	115	4265	115	3169	115	1256
125	7590	125	5855	125	4415	125	2225
135	6452	135	6258	135	4997	135	3518
145	4958	145	5223	145	4908	145	5078
155	2813	155	3862	155	4213	155	6211
165	1304	165	1786	165	3444	165	6754
175	511	175	578	175	2719	175	6661
185	771	185	442	185	2733	185	6135
195	2078	195	1502	195	3494	195	5333
205	3938	205	3450	205	4105	205	3989
215	5587	215	5302	215	4912	215	2903
225	7050	225	6255	225	4835	225	1886
235	7914	235	5765	235	4076	235	1174
245	7885	245	4549	245	2599	245	766
255	7945	255	2843	255	1321	255	486
265	7920	265	1528	265	619	265	348
275	8350	275	1361	275	874	275	448
285	8534	285	2299	285	1890	285	738
295	8430	295	3854	295	3143	295	1395
305	7903	305	5398	305	4292	305	2557
315	6406	315	5991	315	4823	315	3826
325	4592	325	5255	325	4656	325	5153
335	2549	335	3706	335	3691	335	6411
345	1102	345	1849	345	3046	345	6525
355	425	355	536	355	2790	355	6543

## Sheet: Fig. 4b-g,i
Fig. 4b,c										Fig. 4d,f						Fig. 4e									Fig. 4g					Fig. 4i
Frequency (GHz)	n = 12		n = 15		n = 20		n = 22			n (u.c.)	τ (ps)	Δεr'/εr' (0 V)				n = 12		n = 15		n = 20		n = 22			Dipole wave		Flux closure			Measured		Simulated
	εr'	εr''	εr'	εr''	εr'	εr''	εr'	εr''				70 GHz	Maximum	Minimum		Electric Field (kV cm-1)	εr'	Electric Field (kV cm-1)	εr'	Electric Field (kV cm-1)	εr'	Electric Field (kV cm-1)	εr'		Electric Field (kV cm-1)	εr	Electric Field (kV cm-1)	εr		Frequency (GHz)	Δεr'/εr' (0 V)	Frequency (GHz)	Δεr'/εr' (0 V)
2.2098	896.936	58.553	905.066	66.9479	637.025	16.7347	559.126	33.2174		12	0.984	0.03961	0.058923	0.00728		0	728.337	0	709.06	0	567.378	0	456		0	1041.82	0	591.124		2.2098	0.0906621	8.44854	0.174346
2.75975	895.035	73.0999	896.919	81.5434	628.659	27.0809	556.897	52.3603		15	1.038	0.10181	0.119346	0.06569		4.5	731.188	4.5	712.295	4.5	565.706	9	452.811		20	1059.62	20	575.725		2.75975	0.0931292	9.21659	0.196716
3.3097	883.252	82.4296	885.528	91.9621	620.959	26.8499	543.868	48.2605		20	0.4935	0.02626	0.038761	0		9	732.653	9	714.889	9	567.393	18	454.063		40	1002.93	40	546.718		3.3097	0.0906518	9.98464	0.213927
3.85965	869.742	93.4068	873.407	109.041	624.595	35.0253	551.345	55.8497		22	0.5457	0.014	0.0444	0		13.5	731.889	13.5	714.823	13.5	567.381	27	454.342		60	991.18	60	545.323		3.85965	0.093242	10.7527	0.224884
4.4096	860.103	100.298	863.162	114.66	622.546	40.0435	534.352	58.6086								18	731.082	18	710.349	18	568.064	36	454.028		80	957.406	80	531.627		4.4096	0.0962206	11.5207	0.231003
4.95955	850.834	110.402	852.118	122.181	619.358	45.6194	539.205	67.2531								22.5	727.107	22.5	709.653	22.5	565.893	45	456.295		100	884.928	100	520.872		4.95955	0.0980137	12.2888	0.233335
5.5095	839.185	107.211	836.842	120.087	602.901	45.4436	505.032	65.2879								27	724.775	27	699.501	27	565.877	36	457.721		120	847.508	120	514.909		5.5095	0.095167	13.0568	0.23151
6.05945	830.295	117.736	828.178	128.223	600.2	52.2123	510.826	71.0101								31.5	717.552	31.5	697.887	31.5	564.302	27	459.977		140	832.569	140	506.131		6.05945	0.098067	13.8249	0.225402
6.6094	823.016	113.703	816.778	126.918	598.729	46.8889	512.948	67.7895								36	711.418	36	692.972	36	562.352	18	458.034		150	756.98	160	487.423		6.6094	0.098344	14.5929	0.217243
7.15935	812.985	116.255	808.225	128.125	593.341	55.2076	500.274	69.9852								40.5	701.961	40.5	685.719	40.5	560.861	9	459.728							7.15935	0.103995	15.361	0.211225
7.7093	810.436	113.314	805.369	124.283	592.335	44.2041	494.489	60.4095								45	692.214	45	681.978	45	559.997	0	458.531							7.7093	0.104694	16.129	0.210933
8.25925	805.504	115.293	797.76	125.925	592.869	49.5009	494.078	62.0042								40.5	693.796	40.5	679.563	40.5	559.618	-9	458.436							8.25925	0.103754	16.8971	0.217542
8.8092	804.988	117.542	796.561	128.669	588.604	42.4749	497.516	58.8156								36	697.287	36	681.467	36	555.255	-18	461.403							8.8092	0.106043	17.6651	0.229922
9.35915	800.316	116.513	792.179	126.813	589.178	49.8092	496.154	61.7846								31.5	703.486	31.5	684.172	31.5	555.703	-27	461.804							9.35915	0.104679	18.4332	0.245501
9.9091	793.815	122.659	786.392	129.163	588.038	51.0878	492.085	64.4313								27	707.13	27	686.767	27	555.983	-36	466.205							9.9091	0.110325	19.2012	0.261073
10.459	793.218	122.237	781.457	131.604	591.204	47.0817	493.205	63.8693								22.5	711.27	22.5	691.735	22.5	558.126	-45	467.364							10.459	0.109701	19.9693	0.273984
11.009	792.499	124.782	782.238	131.519	592.087	50.8773	491.606	60.7055								18	716.073	18	695.034	18	556.738	-36	467.627							11.009	0.110701	20.7373	0.28348
11.5589	787.956	126.252	776.045	131.881	593.717	46.3078	486.188	58.6191								13.5	721.132	13.5	698.922	13.5	557.982	-27	463.538							11.5589	0.109295	21.5054	0.290705
12.1089	781.951	126.686	771.583	131.518	595.781	48.0474	491.771	56.9544								9	725.239	9	703.149	9	562.138	-18	462.992							12.1089	0.108986	22.2734	0.296885
12.6588	778.023	134.593	768.076	142.285	601.543	61.7284	496.848	66.8081								4.5	727.365	4.5	706.634	4.5	560.195	-9	464.373							12.6588	0.108855	23.0415	0.30166
13.2088	778.877	131.968	766.858	139.742	597.989	57.3041	494.718	62.9211								0	730.045	0	707.831	0	560.867	0	461.385							13.2088	0.111422	23.8095	0.303113
13.7587	769.364	136.484	756.226	143.316	591.799	70.0738	495.253	74.4665								-4.5	730.749	-4.5	703.537	-4.5	559.056									13.7588	0.110523	24.5776	0.29895
14.3087	763.415	142.09	749.634	147.072	589.484	75.6444	489.202	79.7364								-9	730.854	-9	698.54	-9	556.728									14.3087	0.110817	25.3456	0.287845
14.8587	758.571	143.694	744.373	148.81	585.928	70.0638	488.581	84.8547								-13.5	730.214	-13.5	690.86	-13.5	557.796									14.8586	0.112163	26.1137	0.270693
15.4086	748.604	137.5	736.211	143.141	574.47	73.9646	472.723	88.6787								-18	727.511	-18	681.882	-18	558.148									15.4086	0.115806	26.8817	0.251424
15.9586	745.431	139.522	733.095	145.427	579.598	77.1808	464.938	84.6843								-22.5	724.162	-22.5	672.257	-22.5	557.698									15.9585	0.113652	27.6498	0.236132
16.5085	734.676	141.232	725.049	147.611	571.045	86.4217	462.576	84.9407								-27	719.384	-27	653.607	-27	557.89									16.5085	0.113652	28.4178	0.229688
17.0585	731.349	131.064	718.762	141.219	560.441	76.0326	457.587	75.8845								-31.5	712.06	-31.5	646.975	-31.5	554.804									17.0585	0.116824	29.1859	0.232296
17.6084	733.234	125.163	715.027	134.847	547.348	75.6447	450.442	80.8682								-36	706.016	-36	641.647	-36	553.219									17.6084	0.116893	29.9539	0.239604
18.1583	733.749	127.301	713.19	131.614	563.646	52.7254	448.013	69.5695								-40.5	697.132	-40.5	632.783	-40.5	552.608									18.1583	0.116401	30.722	0.24542
18.7083	730.767	131.744	713.635	130.621	581.391	63.5201	459.247	69.1812								-45	688.07	-45	627.565	-45	552.772									18.7083	0.115454	31.49	0.244129
19.2583	726.099	123.636	712.064	126.82	571.613	73.4809	450.643	66.9939								-40.5	690.745	-40.5	629.266	-40.5	548.9									19.2583	0.118862	32.2581	0.232486
19.8082	726.162	123.704	709.004	129.769	570.931	78.8369	459.041	66.1517								-36	695.035	-36	635.56	-36	551.299									19.8082	0.115092	33.0261	0.211363
20.3581	728.337	121.404	709.06	125.523	567.378	77.5468	456	67.5453								-31.5	700.247	-31.5	640.873	-31.5	550.104									20.3581	0.114934	33.7942	0.18595
20.9081	729.129	122.953	709.938	125.81	563.735	83.9841	453.655	72.8836								-27	705.034	-27	648.076	-27	549.713									20.9081	0.11824	34.5622	0.162387
21.4581	724.232	123.742	706.462	124.288	555.747	87.8479	451.069	75.2867								-22.5	710.031	-22.5	656.931	-22.5	551.916									21.4581	0.116058	35.3303	0.143774
22.008	724.061	121.712	708.529	125.236	547.969	90.953	452.688	71.7475								-18	714.742	-18	665.673	-18	553.219									22.008	0.116648	36.0983	0.130198
22.558	722.756	120.665	707.342	125.21	535.561	91.1927	449.59	78.1981								-13.5	719.204	-13.5	675.653	-13.5	554.53									22.558	0.114844	36.8664	0.121265
23.1079	723.226	114.483	703.284	122.063	524.012	75.595	439.761	76.7474								-9	723.227	-9	685.524	-9	557.537									23.1079	0.115223	37.6344	0.117885
23.6578	727.521	116.961	703.104	119.979	523.966	65.707	454.383	81.4806								-4.5	726.321	-4.5	696.371	-4.5	562.146									23.6578	0.118053	38.4025	0.122524
24.2078	735.962	116.316	708.394	114.585	534.14	36.1865	442.536	86.9427								0	728.91	0	700.07	0	559.631									24.2078	0.115745	39.1705	0.137304
24.7578	737.074	124.822	711.053	116.075	557.635	50.654	425.704	99.2704																						24.7577	0.112855	39.9386	0.159985
25.3077	735.799	130.679	717.077	122.347	566.478	68.0285	409.697	82.3968																						25.3077	0.113302	40.7066	0.182696
25.8576	731.118	135.312	714.475	127.775	562.155	78.7364	413.93	68.9126																						25.8576	0.112072	41.4747	0.198318
26.4076	726.162	134.345	711.454	127.536	540.644	86.5532	413.514	60.8742																						26.4076	0.111452	42.2427	0.207115
26.9576	726.62	137.521	714.869	126.483	531.323	64.9914	414.592	49.0093																						26.9576	0.113984	43.0108	0.214386
27.5075	724.043	137.656	714.489	129.432	535.986	61.8807	421.482	51.111																						27.5075	0.11334	43.7788	0.223923
28.0574	724.626	137.062	716.456	132.368	538.902	56.0306	433.726	46.8571																						28.0575	0.108837	44.5469	0.234791
28.6074	724.505	137.716	713.889	135.539	539.264	57.8747	429.657	56.4133																						28.6074	0.11256	45.3149	0.242377
29.1574	724.161	134.767	714.31	136.034	539.824	57.943	427.928	52.8606																						29.1573	0.110849	46.0829	0.24223
29.7073	731.075	136.389	718.089	137.201	543.12	54.288	430.356	41.1915																						29.7073	0.111371	46.851	0.234405
30.2572	735.805	149.342	722.225	139.691	550.191	63.8234	437.062	47.5896																						30.2572	0.106784	47.619	0.224198
30.8072	731.931	157.627	728.576	146.316	549.299	71.7117	437.367	45.1638																						30.8072	0.110903	48.3871	0.217843
31.3572	720.607	159.84	727.886	160.556	543.461	70.5618	442.376	48.8398																						31.3572	0.107026	49.1551	0.218533
31.9071	712.688	157.147	715.153	175.933	537.558	73.6737	438.756	58.0016																						31.9071	0.104626	49.9232	0.226587
32.4571	712.445	155.041	697.223	176.067	523.436	59.5725	426.134	50.3951																						32.4571	0.109824	50.6912	0.241161
33.007	712.626	153.905	689.563	167.623	528.384	39.3971	426.322	42.6941																						33.007	0.110475	51.4593	0.260782
33.557	715.142	150.147	684.664	157.434	534.549	45.5342	425.307	41.3443																						33.557	0.110703	52.2273	0.282969
34.1069	722.584	144.977	695.675	146.455	540.655	33.5986	426.367	29.869																						34.1069	0.112574	52.9954	0.303694
34.6568	733.156	153.448	708.884	148.378	556.753	27.2184	439.116	28.9431																						34.6569	0.10912	53.7634	0.317478
35.2068	739.616	166.267	720.811	159.573	566.033	29.48	447.279	24.8392																						35.2068	0.108263	54.5315	0.319413
35.7567	738.896	184.429	726.404	177.919	567.588	43.1344	455.094	41.8215																						35.7567	0.111778	55.2995	0.308286
36.3067	718.851	196.016	722.45	202.537	586.527	41.2391	455.7	44.5162																						36.3067	0.110456	56.0676	0.28757
36.8567	707.384	186.09	687.951	212.222	587.574	52.8394	448.218	44.9091																						36.8566	0.111041	56.8356	0.263313
37.4066	716.491	188.542	684.989	199.302	585.473	68.5997	448.495	53.7409																						37.4066	0.113911	57.6037	0.240786
37.9566	716.74	197.351	679.347	202.29	585.706	60.6826	460.965	46.9723																						37.9566	0.112562	58.3717	0.222041
38.5065	707.287	212.772	668.759	202.013	580.919	70.7603	462.206	57.5251																						38.5065	0.115142	59.1398	0.206073
39.0564	690.942	211.556	665.545	196.256	573.372	74.2041	442.054	60.8472																						39.0564	0.115632	59.9078	0.191357
39.6064	682.84	202.817	660.781	194.503	584.767	74.2335	450.941	52.4503																						39.6064	0.112101	60.6759	0.178472
40.1564	682.631	196.335	657.13	187.361	589.327	77.5766	459.216	49.7793																						40.1564	0.115666	61.4439	0.170399
40.7063	680.933	193.609	661.875	183.507	600.585	82.5071	467.739	53.796																						40.7063	0.114081	62.212	0.169879
41.2563	676.26	193.725	659.717	190.453	587.085	112.862	464.353	64.3227																						41.2563	0.114137	62.98	0.176264
41.8062	680.216	194.011	659.699	183.451	582.689	125.092	484.815	60.943																						41.8062	0.113146	63.7481	0.184968
42.3561	675.53	194.562	660.366	187.871	554.849	126.788	485.705	86.2019																						42.3561	0.119345	64.5161	0.189921
42.9061	672.483	188.084	657.576	188.632	552.548	105.851	479.456	104.133																						42.9061	0.115659	65.2842	0.186904
43.456	673.086	184.751	647.973	181.427	563.83	108.083	472.401	116.845																						43.4561	0.115913	66.0522	0.175465
44.006	675.637	180.111	661.132	177.567	539.209	115.822	427.507	120.102																						44.006	0.114373	66.8203	0.158881
44.556	681.926	176.614	666.52	179.631	545.929	80.964	434.75	85.0975																						44.5559	0.11423	67.5883	0.143142
45.1059	692.354	179.29	663.389	185.527	561.912	83.5043	435.904	91.8579																						45.1059	0.115353	68.3564	0.134556
45.6559	698.209	191.354	663.366	187.101	581.521	100.272	430.727	88.9002																						45.6559	0.113716	69.1244	0.135246
46.2058	696.132	201.692	663.547	185.538	561.076	116.698	434.872	84.8846																						46.2058	0.113732	69.8925	0.140808
46.7557	690.471	203.07	667.501	186.22	555.067	90.118	439.112	87.873																						46.7557	0.113299	70.6605	0.144795
47.3057	691.54	209.85	668.63	200.085	570.505	75.1141	445.798	79.7926																						47.3057	0.118738	71.4286	0.145502
47.8556	677.71	210.625	653.824	196.865	592.613	91.0723	441.791	83.4824																						47.8556	0.116267	72.1966	0.147324
48.4056	677.641	207.35	659.485	193.495	606.578	116.74	460.364	83.5216																						48.4056	0.111548	72.9647	0.155639
48.9556	677.065	202.492	660.965	191.075	597.744	132.398	471.627	93.9658																						48.9556	0.108405	73.7327	0.170908
49.5055	677	204.288	666.223	195.035	589.516	142.85	468.305	122.892																						49.5055	0.111724	74.5008	0.188532
50.0555	681.369	202.653	657.128	197.038	573.87	150.653	448.946	129.602																						50.0555	0.112228	75.2688	0.203127
50.6054	685.077	204.309	662.449	190.946	574.004	140.567	434.712	129.417																						50.6054	0.113255	76.0369	0.211719
51.1553	685.7	208.783	668.121	196.734	583.46	146.523	433.038	112.917																						51.1554	0.107381	76.8049	0.214451
51.7053	687.186	215.099	666.422	199.938	577.833	161.998	433.1	133.755																						51.7053	0.108775	77.573	0.214039
52.2552	682.575	220.093	667.775	205.705	565.659	171.61	423.152	142.886																						52.2553	0.106738	78.341	0.214514
52.8052	682.209	220.799	666.358	210.389	566.677	175.99	406.883	118.698																						52.8052	0.113497	79.1091	0.218969
53.3552	674.385	226.078	665.152	216.256	545.459	193.95	417.754	118.325																						53.3551	0.108386	79.8771	0.22726
53.9051	671.737	225.526	659.056	220.111	520.801	189.589	413.753	128.136																						53.9051	0.107866	80.6452	0.235739
54.455	663.795	223.214	654.266	223.852	523.426	163.931	403.965	119.859																						54.455	0.107854	81.4132	0.239362
55.005	665.638	217.829	647.81	216.179	513.699	175.744	404.264	115.746																						55.005	0.110194	82.1813	0.235054
55.5549	670.206	218.985	655.243	213.853	511.865	152.622	414.374	109.213																						55.5549	0.106321	82.9493	0.224828
56.1049	666.756	221.872	649.123	223.558	526.48	149.634	423.706	124.476																						56.1049	0.104628	83.7174	0.215256
56.6549	667.555	215.422	641.632	217.398	533.7	154.559	418.518	126.653																						56.6548	0.104546	84.4854	0.212394
57.2048	675.615	215.74	645.697	212.628	530.517	174.063	409.185	140.555																						57.2048	0.104574	85.2535	0.218002
57.7548	678.325	219.513	652.475	213.013	516.066	168.906	390.716	135.523																						57.7548	0.106904	86.0215	0.230342
58.3047	679.209	228.941	657.136	214.504	513.63	169.773	393.549	121.828																						58.3047	0.108997	86.7896	0.2469
58.8546	672.344	234.257	657.426	224.561	503.413	166.714	391.1	119.767																						58.8546	0.105548	87.5576	0.266335
59.4046	668.478	231.468	650.116	230.268	496.879	155.416	401.577	112.874																						59.4046	0.107287	88.3257	0.288497
59.9545	670.082	233.218	644.146	222.767	504.343	142.396	403.81	120.581																						59.9546	0.106053	89.0937	0.311909
60.5045	670.887	234.998	647.285	223.72	519.407	146.309	392.594	124.839																						60.5045	0.102769	89.8618	0.33027
61.0545	668.589	238.391	646.064	226.086	525.089	165.545	391.848	118.094																						61.0545	0.103877	90.6298	0.332245
61.6044	666.78	241.871	650.634	229.334	511.684	170.182	393.341	114.205																						61.6044	0.104161	91.3978	0.309068
62.1544	665.866	244.505	644.929	232.596	502.679	166.368	399.807	118.423																						62.1543	0.100239	92.1659	0.266057
62.7043	658.881	247.833	643.659	234.579	496.05	156.825	395.234	117.066																						62.7043	0.103109	92.9339	0.221008
63.2542	657.147	246.058	645.712	236.033	498.853	155.471	399.698	120.504																						63.2542	0.10524	93.702	0.189342
63.8042	656.743	244.923	642.447	240.23	500.704	147.887	396.053	124.953																						63.8042	0.102773	94.47	0.176674
64.3542	656.699	246.518	638.119	240.854	508.626	141.363	388.729	123.637																						64.3542	0.103914	95.2381	0.181377
64.9041	654.369	253.688	638.827	242.37	521.311	152.802	388.84	119.222																						64.9041	0.104468	96.0061	0.197763
65.454	651.653	252.894	633.076	248.239	515.22	160.243	390.853	113.724																						65.454	0.100939	96.7742	0.217709
66.004	647.021	256.563	628.144	246.817	508.848	163.378	387.023	116.261																						66.004	0.101834	97.5422	0.232645
66.554	641.12	254.483	623.844	249.02	504.539	157.407	391.252	111.589																						66.554	0.102039	98.3103	0.236784
67.1039	638.249	252.277	616.453	245.786	506.743	159.632	395.397	112.669																						67.1039	0.101616	99.0783	0.230755
67.6539	636.841	251.849	614.035	239.267	504.143	159.691	394.591	111.841																						67.6539	0.0995118	99.8464	0.2228
68.2038	634.984	254.314	616.345	242.324	504.038	158.854	393.57	108.05																						68.2038	0.0989279	100.614	0.224384
68.7537	632.348	254.844	619.194	241.225	497.173	158.385	391.694	105.467																						68.7537	0.101178	101.382	0.24218
69.3037	632.617	254.651	614.603	246.389	493.302	142.636	401.492	100.736																						69.3037	0.0982206	102.151	0.272821
69.8537	628.435	254.174	611.758	249.018	502.864	135.364	408.358	105.698																						69.8537	0.0966462	102.919	0.30382
70.4036	628.782	251.976	608.102	250.497	511.473	138.777	410.987	106.566																						70.4036	0.101813	103.687	0.320827
70.9536	629.114	254.432	596.551	243.922	520.861	135.927	416.053	105.761																						70.9536	0.0998458	104.455	0.318021
71.5035	628.095	255	597.376	239.895	527.197	147.622	416.416	110.728																						71.5035	0.0967265	105.223	0.30155
72.0534	629.002	254.272	599.165	235.876	528.841	148.708	425.173	109.595																						72.0534	0.0972439	105.991	0.281892
72.6034	629.971	257.532	600.515	234.206	529.269	152.972	432.696	126.181																						72.6034	0.0967117	106.759	0.26643
73.1534	626.828	263.587	597.24	231.54	530.184	157.09	421.321	134.187																						73.1534	0.0923348	107.527	0.258724
73.7033	623.994	262.991	607.429	231.302	528.096	161.245	413.677	134.513																						73.7033	0.0967526	108.295	0.259417
74.2532	621.589	262.969	608.056	235.741	527.616	156.128	411.956	129.673																						74.2533	0.0960654	109.063	0.265732
74.8032	624.202	260.133	604.878	237.124	524.488	153.499	408.99	137.379																						74.8032	0.0955291	109.831	0.272135
75.3531	628.192	267.605	606.21	231.539	537.882	151.445	399.634	133.936																						75.3531	0.0925334	110.599	0.273377
75.9031	626.9	271.915	613.908	238.42	542.097	155.692	404.087	125.648																						75.9031	0.0902738
76.4531	621.264	281.721	618.19	249.567	540.651	161.591	412.602	122.295																						76.453	0.0964874
77.003	613.901	280.071	613.357	257.071	543.643	165.545	408.712	130.583																						77.003	0.0957161
77.5529	612.944	279.371	606.991	264.469	537.905	169.141	397.2	129.907																						77.5529	0.100769
78.1029	620.147	280.999	597.727	259.103	531.355	163.561	396.724	122.621																						78.1029	0.0853399
78.6529	614.568	285.746	601.84	257.209	539.065	156.556	405.242	116.707																						78.6529	0.0898862
79.2028	609.89	288.116	603.139	263.297	543.817	158.371	407.835	112.874																						79.2028	0.0989976
79.7528	612.121	288.121	599.94	261.661	546.508	158.384	413.961	114.87																						79.7527	0.102683
80.3027	610.819	293.741	594.529	264.212	545.437	173.77	414.631	116.317																						80.3027	0.0903541
80.8526	608.288	294.42	600.989	270.874	544.536	174.567	412.737	113.984																						80.8526	0.0962338
81.4026	603.909	299.141	598.669	286.394	541.496	169.667	417.942	111.569																						81.4026	0.0901087
81.9526	603.894	303.181	577.566	293.924	548.86	181.871	421.91	113.426																						81.9526	0.0870468
82.5025	598.099	306.643	566.563	280.181	536.312	191.446	423.966	111.151																						82.5025	0.0927448
83.0524	598.257	306.931	563.903	275.164	526.446	184.786	431.066	115.301																						83.0524	0.0847158
83.6024	597.679	316.662	566.476	275.914	520.192	178.852	429.583	125.238																						83.6024	0.086857
84.1523	586.836	313.266	564.532	266.231	515.708	162.894	435.482	133.001																						84.1523	0.0906295
84.7023	580.129	313.571	574.419	269.441	519.227	149.739	430.487	145.199																						84.7023	0.0874253
85.2523	585.955	315.515	576.334	268.393	533.816	152.224	413.618	146.384																						85.2523	0.0897313
85.8022	583.232	311.651	577.879	274.936	540.886	161.297	404.155	142.662																						85.8022	0.0940636
86.3521	581.539	312.053	573.811	276.202	535.147	154.824	397.438	134.455																						86.3522	0.0927503
86.9021	580.071	319.017	568.724	273.049	537.689	165.388	398.449	122.239																						86.9021	0.0869873
87.452	571.366	317.909	574.312	274.511	544.025	160.38	403.893	117.772																						87.452	0.0895881
88.002	568.767	316.677	577.577	275.522	543.765	161.493	406.175	119.495																						88.002	0.0851526
88.552	564.292	313.063	586.26	284.359	548.784	164.942	410.595	111.6																						88.552	0.0952231
89.1019	570.807	314.737	575.334	296.73	545.341	170.667	409.421	116.733																						89.1019	0.092472
89.6518	568.745	313.264	572.698	298.588	543.034	173.024	404.759	117.64																						89.6519	0.08756
90.2018	568.737	317.118	564.933	304.297	534.054	173.734	402.007	104.077																						90.2018	0.0901889
90.7518	576.166	319.58	557.832	303.321	528.6	161.727	416.438	98.8144																						90.7518	0.100438
91.3017	570.593	319.52	556.436	295.682	531.273	152.052	424.853	101.449																						91.3017	0.0918304
91.8517	567.233	320.978	555.882	293.589	538.702	148.177	421.751	107.756																						91.8517	0.0893525
92.4016	565.589	318.803	558.252	292.464	547.402	156.363	416.973	113.868																						92.4016	0.0904173
92.9515	567.425	311.369	562.032	295.223	539.63	157.882	410.682	110.408																						92.9515	0.0901939
93.5015	581.088	317.197	557.222	296.036	543.595	153.121	411.981	100.673																						93.5015	0.0885826
94.0515	575.571	324.234	561.805	294.27	550.068	154.458	405.421	100.275																						94.0514	0.0887258
94.6014	574.112	325.727	560.412	293.314	542.238	158.413	402.693	80.8304																						94.6014	0.0841545
95.1513	564.268	323.531	557.054	290.78	547.427	142.31	416.777	74.282																						95.1513	0.0890217
95.7013	571.112	319.505	571.214	293.657	554.803	163.288	426.106	73.3928																						95.7013	0.0963325
96.2512	575.598	326.617	567.293	303.973	551.007	170.924	430.603	76.5727																						96.2512	0.0917297
96.8012	568.237	322.285	555.376	304.398	543.979	170.368	436.723	79.4764																						96.8012	0.0869116
97.3512	567.134	319.874	555.91	294.644	532.521	170.548	432.135	79.7813																						97.3512	0.097414
97.9011	567.125	316.576	562.744	284.617	539.036	163.948	436.758	75.6822																						97.9011	0.0985885
98.451	559.303	314.545	568.131	288.289	545.225	163.934	447.71	77.348																						98.451	0.0905499
99.001	565.413	310.028	578.347	290.786	538.037	171.894	443.026	85.7521																						99.001	0.102235
99.551	577.845	304.954	575.105	294.392	542.468	165.529	445.03	86.9091																						99.551	0.0979755
100.101	576.546	302.247	568.334	305.983	522.508	176.498	440.136	92.8913																						100.101	0.0904495
100.651	579.562	305.023	570.247	303.289	516.58	156.38	434.313	97.4015																						100.651	0.0996768
101.201	585.043	304.045	563.373	290.878	523.247	153.989	435.974	81.7283																						101.201	0.0927986
101.751	575.448	310.37	575.104	289.143	539.681	159.946	445.696	84.1051																						101.751	0.0983204
102.301	571.494	317.677	576.829	296.506	538.971	173.374	440.915	89.483																						102.301	0.0937813
102.851	571.746	316.101	575.007	302.04	530.38	175.191	441.912	95.797																						102.851	0.0969727
103.401	566.432	314.094	578.694	302.653	523.132	181.336	438.364	94.7915																						103.401	0.102465
103.951	560.331	306.191	564.892	299.29	517.127	176.157	425.584	103.549																						103.951	0.0775747
104.501	555.952	300.081	575.972	306.774	510.506	174.862	415.214	101.261																						104.501	0.0960527
105.05	557.798	296.023	566.605	293.421	506.322	183.703	427.021	87.0719																						105.05	0.0833637
105.6	560.587	287.827	562.508	299.608	488.386	178.804	430.824	95.633																						105.6	0.0798479
106.15	563.956	294.45	563.205	298.619	479.144	160.986	427.685	101.716																						106.15	0.0656946
106.7	569.056	295.484	567.7	306.232	484.562	160.04	424.596	103.548																						106.7	0.0783491
107.25	564.046	299.767	555.032	298.128	486.729	156.05	416.822	101.128																						107.25	0.0830547
107.8	554.249	293.584	548.037	288.243	482.978	153.575	405.86	100.622																						107.8	0.0770087
108.35	552.135	284.262	560.466	275.297	477.637	143.175	407.917	87.0048																						108.35	0.0860981
108.9	544.208	285.393	565.911	286.798	482.465	149.54	400.68	76.3152																						108.9	0.0853106
109.45	540.773	279.822	570.539	294.199	476.17	147.39	410.459	82.3638																						109.45	0.0862022
110	543.186	273.77	576.508	300.986	476.668	132.145	414.766	89.4601																						110	0.101132
